# Supplementary material for: A pH‐ and ionic strength‐dependent conformational change in the neck region regulates DNGR‐1 function in dendritic cells
Source: PubMed Central journal article supplement (PMC5109244; doi:10.15252/embj.201694695), 2016-10-17
Supplement: EMBJ-35-2484-s002.pdf [file EMBJ-35-2484-s002.pdf]

A

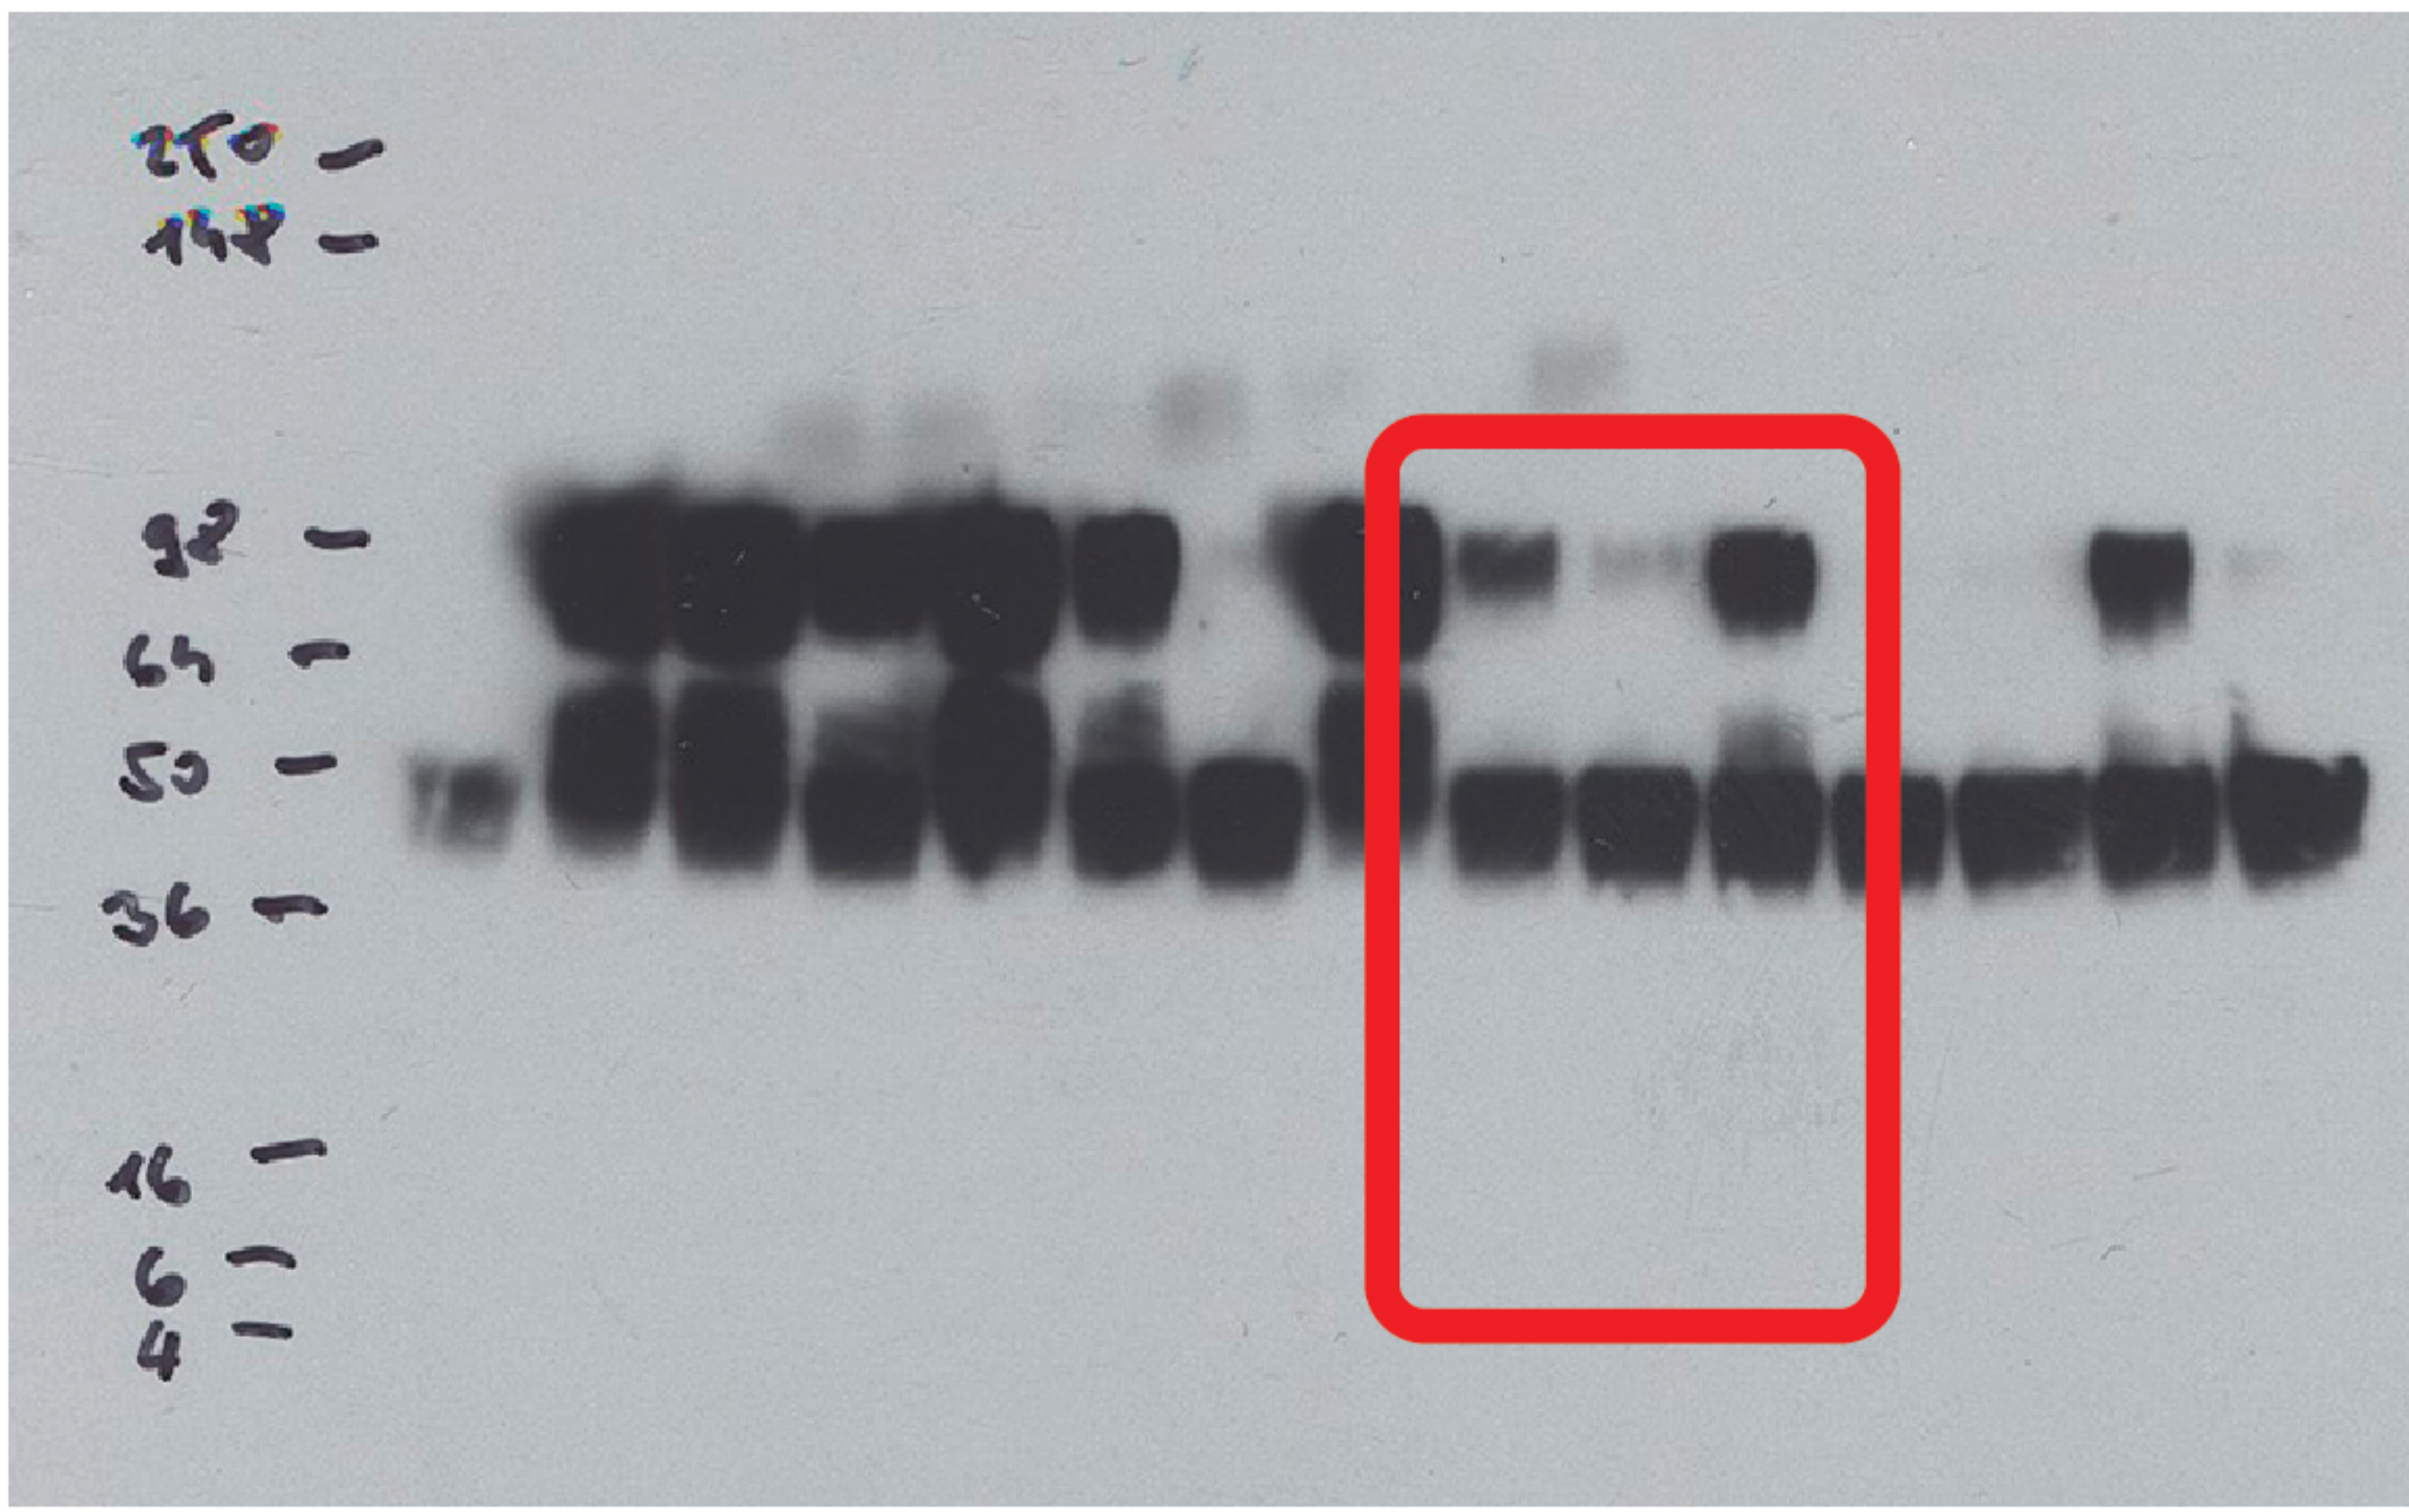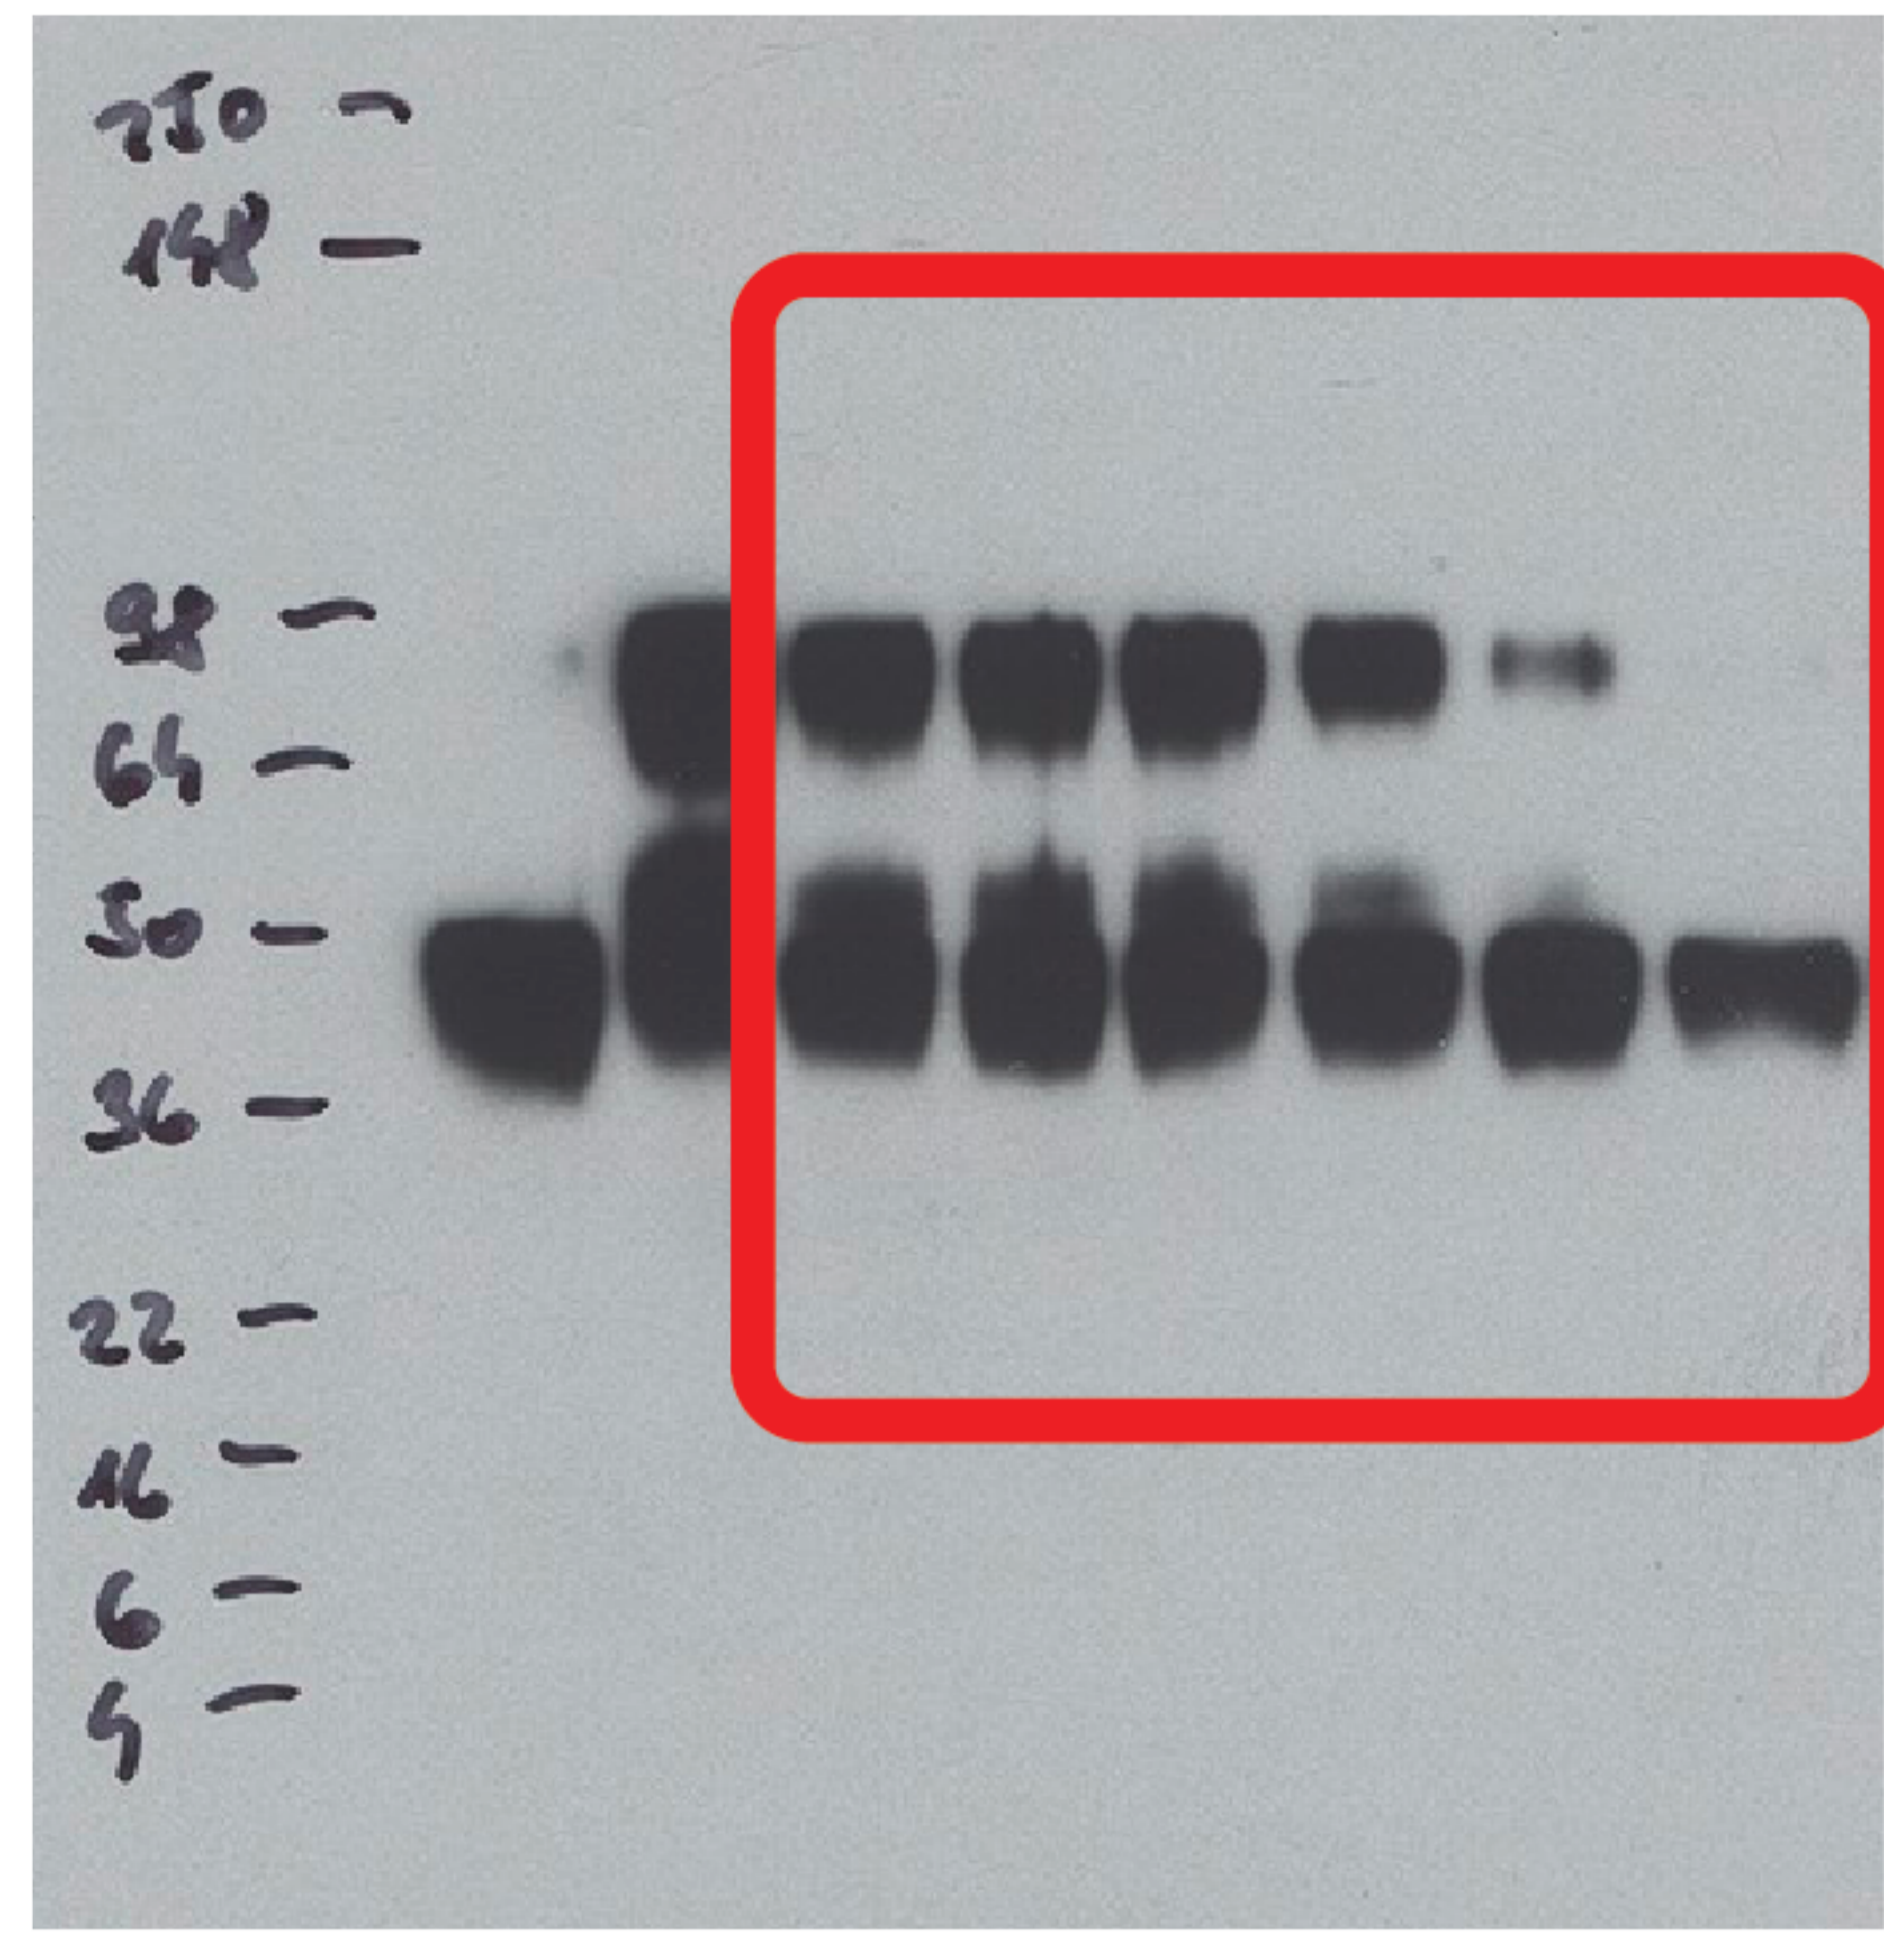

C

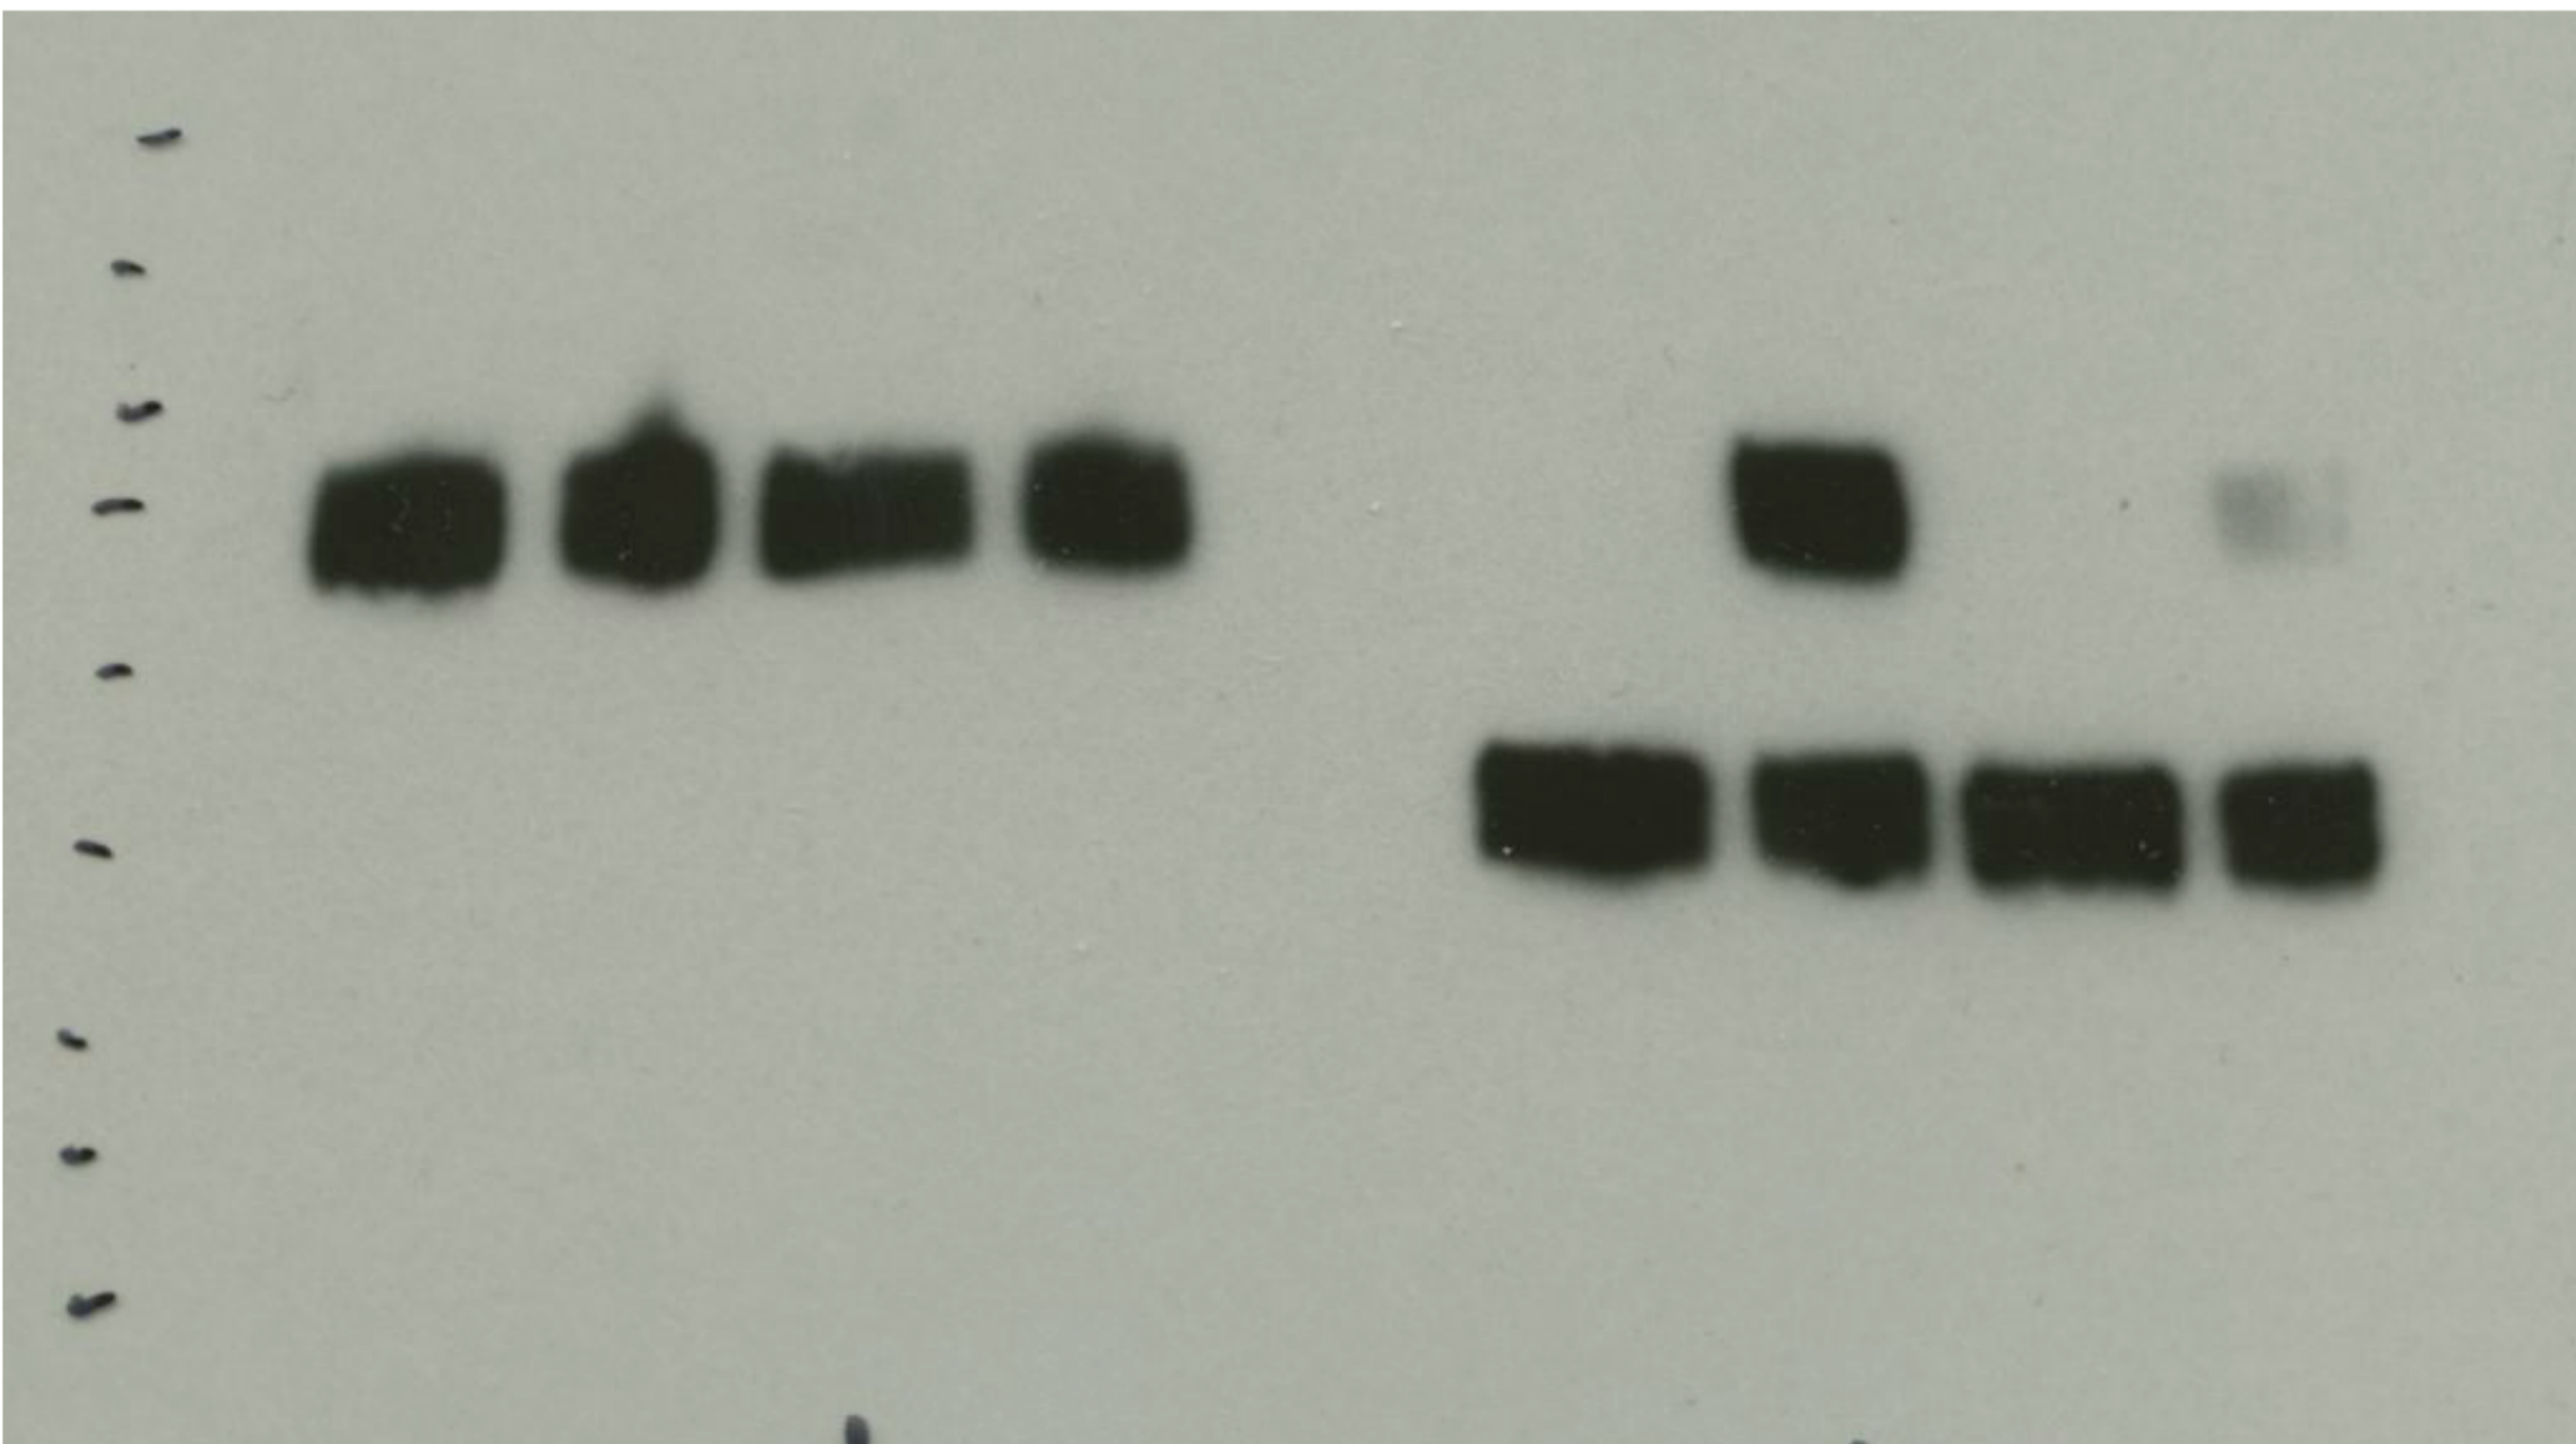

D

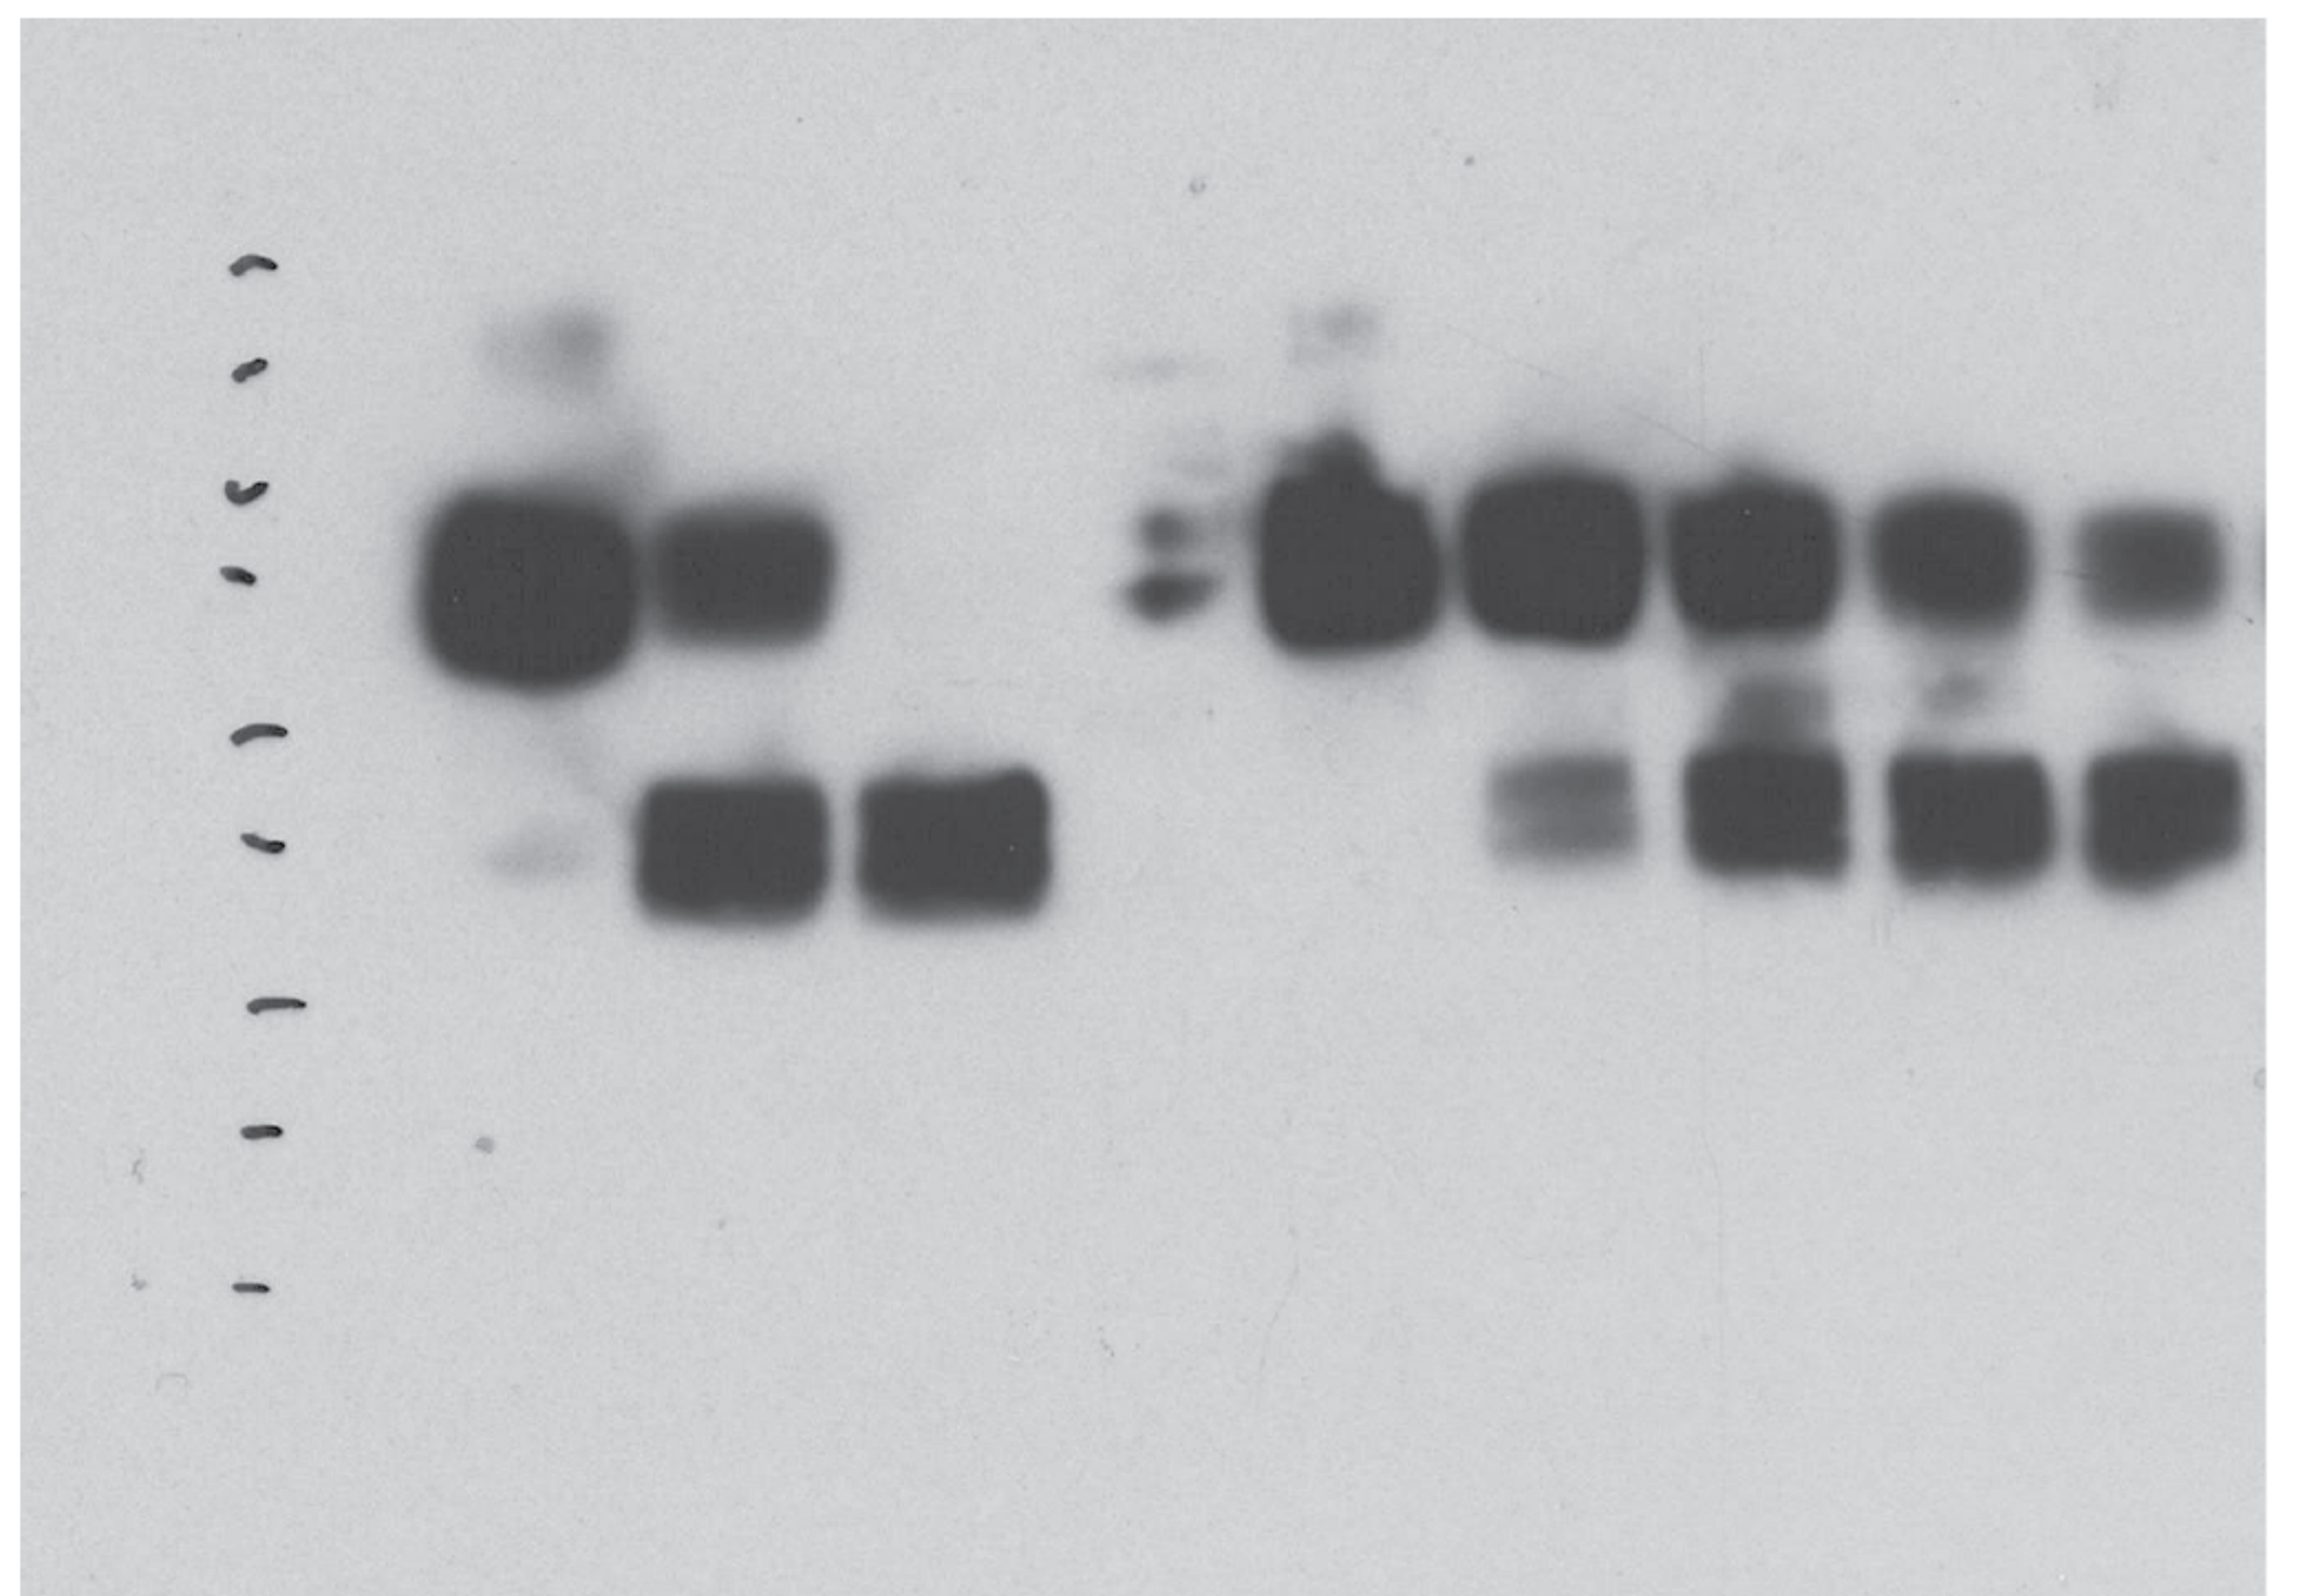

Figure 2 - source data
